# Supplementary material
Source: PubMed Central journal article supplement (PMC6764443)
Supplement: NIHMS1028162-supplement-Supplemental.pdf [file NIHMS1028162-supplement-Supplemental.pdf]

## Supplemental material

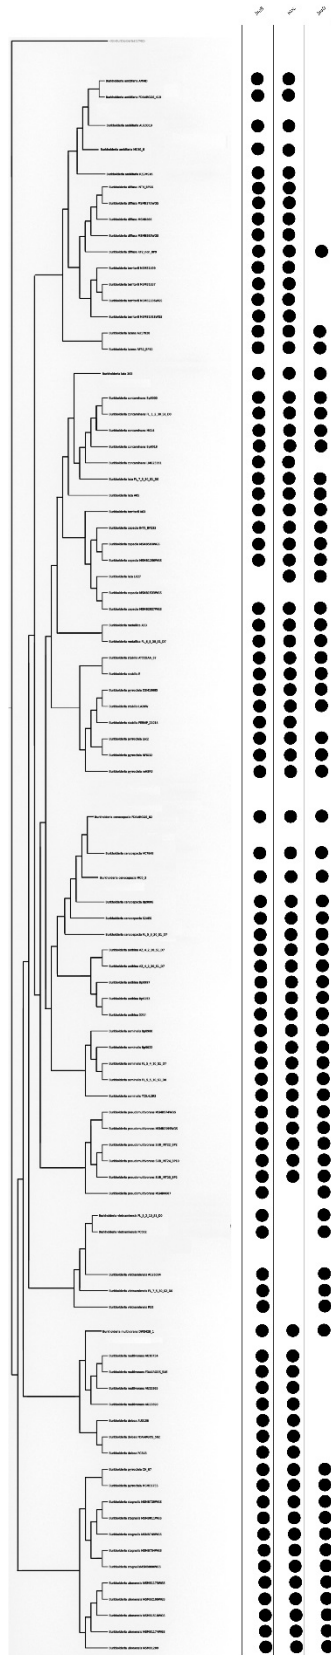

**Figure S1.** *Burkholderia cepacia* complex (Bcc) whole-genome phylogram of representative genomes showing the distribution of class B, C and D  $\beta$ -lactamases using the composition vector method.

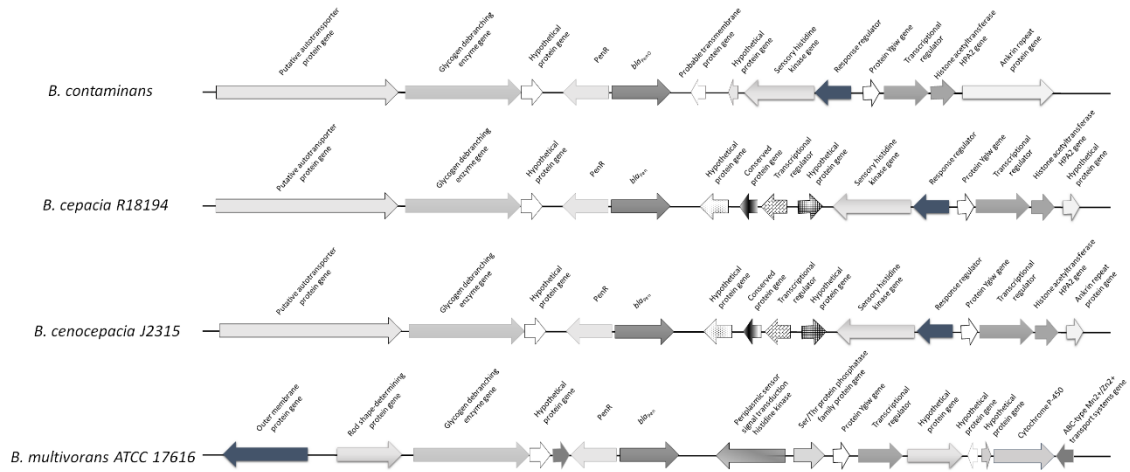

**Figure S2.** Genetic context of *bla*<sub>Pen</sub> genes. Arrows represent the direction of transcription.

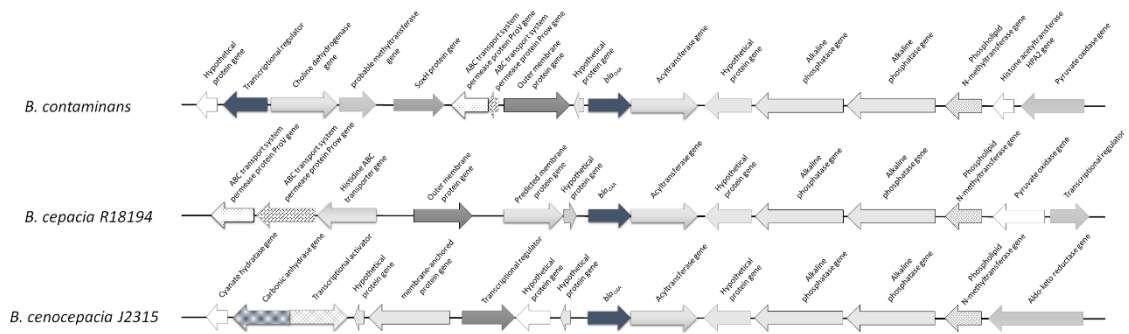

**Figure S3.** Genetic environment of *bla*<sub>OXA-like</sub>. Arrows represent the direction of transcription.

**Table S1 Primers used in this study**

| Primer                           | Purpose                            | Sequence (3' to 5')       | Product size (bp) |
|----------------------------------|------------------------------------|---------------------------|-------------------|
| <i>bla</i> <sub>PenO</sub> F ext | <i>bla</i> <sub>PenO</sub> cloning | CAGCCTAGGGCAAAGGTGCCGAC   | 1429              |
| <i>bla</i> <sub>PenO</sub> F ext | <i>bla</i> <sub>PenO</sub> cloning | CGCGGATCGCGTCACGCACGTCTCG | 1429              |
| <i>bla</i> <sub>PenO</sub> F int | <i>bla</i> <sub>PenO</sub> PCR     | CGTCGAACCCTGTTGCTGGCC     | 768               |
| <i>bla</i> <sub>PenO</sub> R int | <i>bla</i> <sub>PenO</sub> PCR     | GTCGCCGGTGCCCGTCTTGTC     | 768               |
| <i>bla</i> <sub>OXA-like</sub> F | <i>bla</i> <sub>OXA-like</sub> PCR | GATGCCACCCGATCTGTAC       | 496               |
| <i>bla</i> <sub>OXAlike</sub> R  | <i>bla</i> <sub>OXA-like</sub> PCR | CTCGGTCATGTCGTATGCGT      | 496               |
